# Supplementary material for: Targeting endogenous proteins for degradation through the affinity-directed protein missile system
Source: PubMed Central journal article supplement (PMC5451546; doi:10.1098/rsob.170066), 2017-05-10

**Targeting endogenous proteins for degradation through the affinity-directed protein missile system.**

Luke J. Fulcher, Luke D. Hutchinson, Thomas J. Macartney, Craig Turnbull and Gopal P. Sapkota\*

**Electronic Supplementary Material figure legends and figures:**

**figure S1: Effects of SHP2 AdPROM on SHP2 mRNA levels.** MDA-MB-468 cells infected with VHL, aCS3 or VHL-aCS3 retroviruses were lysed and mRNA extracted. Uninfected wild-type (WT) cells were included as controls. Complementary DNA was generated and the q-RTPCR performed to measure SHP2 mRNA transcript levels across the different conditions. SHP2 transcript levels were normalised to GAPDH transcripts. NS and \* refer to comparison between VHL, aCS3 or VHL-aCS3 and WT. NS = non-significant. \*= P<0.05; N=3.

**figure S2: Proteolytic AdPROM employs CUL2-CRL for SHP2 destruction (NSa1).** **(a)** Uninfected U2OS cells (WT) or cells infected with retroviruses encoding FLAG-VHL-aNSa1 or control viruses (VHL alone, FLAG-aNSa1 alone) were treated with MLN4924 (1  $\mu$ M) for 0, 6 or 24 h. Cells were lysed and extracts (20  $\mu$ g protein) were resolved by SDS-PAGE and transferred to PVDF membranes, which were subjected to Western blotting with the indicated antibodies. HIF1 $\alpha$  serves as a positive control for MLN4924 treatment. **(b)** U2OS cells treated with or without MLN4924 (1  $\mu$ M) for 24 h were lysed and extracts (1 mg protein) subjected to immunoprecipitation (IP) with anti-FLAG M2 resins. Following elution, both IPs and input extracts (20  $\mu$ g protein) were resolved by SDS-PAGE and transferred to PVDF membranes, which were subjected to Western blotting with the indicated antibodies.

## SHP2

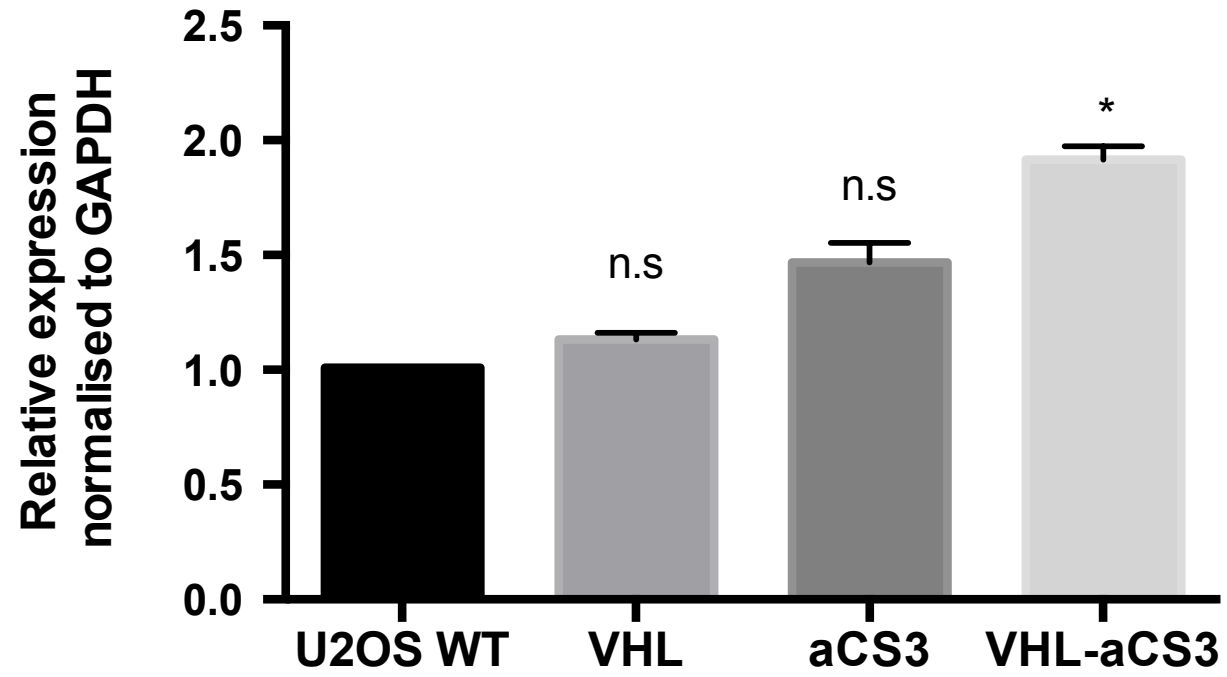

(a)

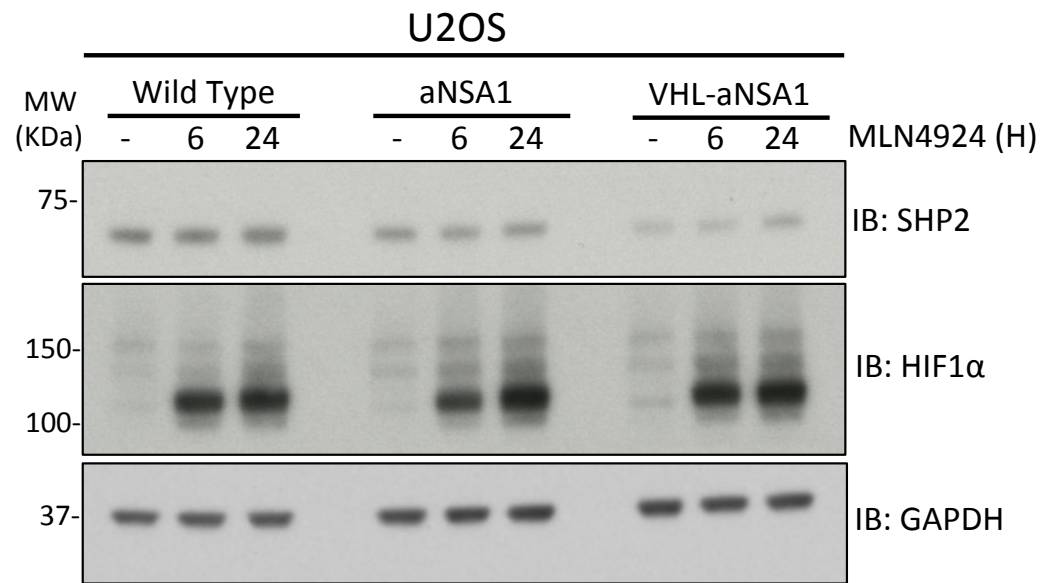

(b)

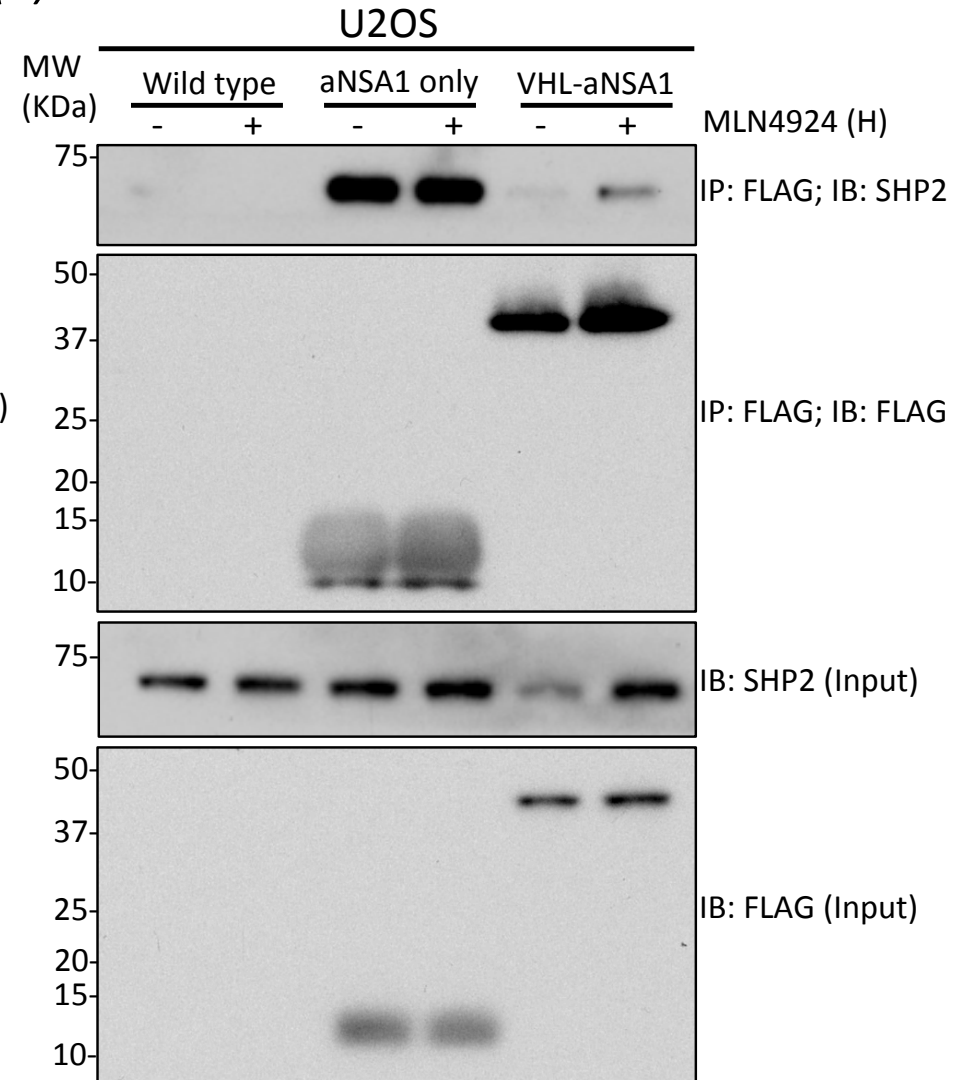

Supplement: rsob170066supp1.pdf [file rsob170066supp1.pdf]
